# Supplementary material for: Near-Infrared OCT Imaging for the Assessment of Anisocoria
Source: Research Square preprint supplement (doi:10.21203/rs.3.rs-7529153/v1), 2025-10-07
Supplement: Supplementary file 2 [file cbb55f0c02e882f0489d1a92.xlsx]

## Sheet: Sheet1
TABLE 1. Participant demographics
Group	Subgroup	N (%) [N photos]
Total		30 (100%) [358]
Gender	Male	14 (45.8%) [164]
	female	16 (54.2%) [194]
Eye color	Blue	13 (44.7%) [160]
	Hazel	6 (18.7%) [67]
	Dark brown	11 (36.6%) [131]
Age	Children (0-17)	16 (54.5%) [195]
	Mean (sd)	7.74 (±5.71)
	Range	8 months- 16 years
	Adults (18+)	14 (45.5%) [163]
	Mean (sd)	40.03 (±16.31)
	Range	25-70 years
