# Supplementary material for: Near-Infrared OCT Imaging for the Assessment of Anisocoria
Source: Research Square preprint supplement (doi:10.21203/rs.3.rs-7529153/v1), 2025-10-07
Supplement: Supplementary file 3 [file cd27af682f55b07596500dad.xlsx]

## Sheet: Sheet1
TABLE 2. Inter-rater ICC reliability scores for pupil measurements taken from OCT and Samsung S20 photos by eye color, age group, and sex
Subgroup	Method	N	Pupil size difference (right-left)
			ICC (99% CI)	SEM
				(mm)
	OCT	182	0.97 (0.96-0.98)	0.8
	Blue	80	0.95 (0.91-0.97)	0.93
	Hazel	36	0.99 (0.97-0.99)	0.68
Eye color	Brown	66	0.98 (0.96-0.99)	0.7
	0-17	99	0.97 (0.95-0.98)	0.72
Age group	18+	83	0.97 (0.94-0.98)	0.9
	Male	87	0.98 (0.96-0.99)	0.75
Sex	Female	95	0.96 (0.94-0.98)	0.85
	Samsung S20	176	0.84 (0.77-0.89)*	1.98
	Blue	80	0.94 (0.90-0.97)	1.27
	Hazel	31	0.92 (0.83-0.97)	1.62
Eye color	Brown	65	0.62 (0.42-0.78)*†	2.55
	0-17	96	0.81 (0.71-0.88)*	1.6
Age group	18+	80	0.84 (0.75-0.90)*	2.01
	Male	77	0.81 (0.68-0.88)*	2.4
Sex	Female	99	0.86 (0.81-0.93)*	1.58
All p-values <0.001
SEM= standard error of measurement, in millimeters
*Statistically significant difference between the ICC scores of the OCT and smartphone groups, based on the 99% confidence interval
† Statistically significant difference between the ICC between the subgroups of each method, based on the 99% confidence interval
